# Supplementary material for: Recoverable hydrogel with high stretchability and toughness achieved by low-temperature hydration of Portland cement
Source: Royal Society of Chemistry journal article supplement (doi:10.1039/c8qm00391b), 2018-01-01
Supplement: c8qm00391b1.pdf [file c8qm00391b1.pdf]

## 11 **Materials and Methods**

### 12 Materials

13 Acrylamide (AM), Ammonium persulfate (APS), and N, N, N', N'-tetramethyl-  
14 ethylenediamine (TEMED) (99%), were purchased from Sigma-Aldrich Chemical  
15 Reagent Co., Ltd., and used without further purification. Polycarboxylate-ether based  
16 superplasticizer (PCE)/water solution with a concentration of 21.5wt% was produced  
17 by Grace Concrete Admixture Products. Portland cement that satisfies the  
18 requirements of BS EN197-1:2000 (a European standard that was adopted as a British  
19 Standard) for CEM I Portland cement of strength class 52.5 N (roughly equivalent to  
20 the requirements of ASTM C150 for Type I Portland cement) is used in this study.

21

### 22 Preparation of cement-generated calcium hydroxide nano-spherulites (ce-CNS) 23 suspension

24 PCE was dissolved in deionized water to obtain a 0.1 wt% solution. 0.02 wt% and 0.1  
25 wt% Portland cement powder was added slowly into the PCE solution under stirring  
26 and ultrasonication for 10 min to yield a homogeneous dispersion. The whole process  
27 was conducted at 0°C in an ice bath.

28

### 29 Preparation of PAM/cement hydrogels and xerogels

30 The PAM/cement hydrogels were prepared by in situ free radical polymerization. The  
31 monomer AM, the initiator APS, and the accelerator TEMED were added into the  
32 Portland cement/PCE suspension of composition: cement-PCE  
33 suspension/AM/APS/TEMED=60g/15g/0.03g/48μL. For the complete reaction of ce-

34 CNS and APS, the mixture was kept at 0°C in an ice bath for at least 72 h. The  
35 polymerization process proceeded in a vacuum environment (0.01 atm) at 0°C. The  
36 PAM/cement xerogels were prepared by immersing the as-prepared hydrogels in a  
37 large excess of deionized water at 25°C for 3 weeks in order to reach swelling  
38 equilibrium, during which the water was replaced several times. The swollen samples  
39 were then freeze-dried.

40

#### 41 Characterization of morphology and structure of ce-CNS and PAM/cement xerogels

42 The morphology and distribution of ce-CNS were characterized by transmission  
43 electron microscopy (TEM; JEOL, JEM-2100, 200 kV), equipped with an energy  
44 dispersive spectroscopy (EDS) system. The zeta potential of ce-CNS was tested using  
45 a dynamic light scattering (DLS, Malvern Zetasizer Nano ZS 90). The inductively  
46 coupled plasma optical emission spectrometer (ICP-OES) used for ce-CNS  
47 concentration determination was an Optima 7300 DV ICP-OES. The structure of the  
48 PAM/cement xerogel was characterized by a high resolution scanning electron  
49 microscope (SEM; JEOL, model JSM-6700F).

50

#### 51 Mechanical Tests

52 Mechanical tests were conducted at 25°C using a MTS (Model E44, EXCEED)  
53 testing machine. The samples for the elongation tests were of rod-like shape with 30  
54 mm in length and 3.4 mm in diameter, for the as-prepared PAM/cement hydrogels.  
55 The stretched portion of the samples between the two clamps was 2.0 mm, and the

56 samples were elongated at a loading rate of  $50 \text{ mm min}^{-1}$ . For the compression tests,  
57 cylindrical samples of the as-prepared hydrogels were used with dimensions of 10.2  
58 mm in diameter and 9.8 mm in height. The crosshead speed was  $1 \text{ mm min}^{-1}$ , and  
59 stopped at the maximum loading of 8400 N.  
60

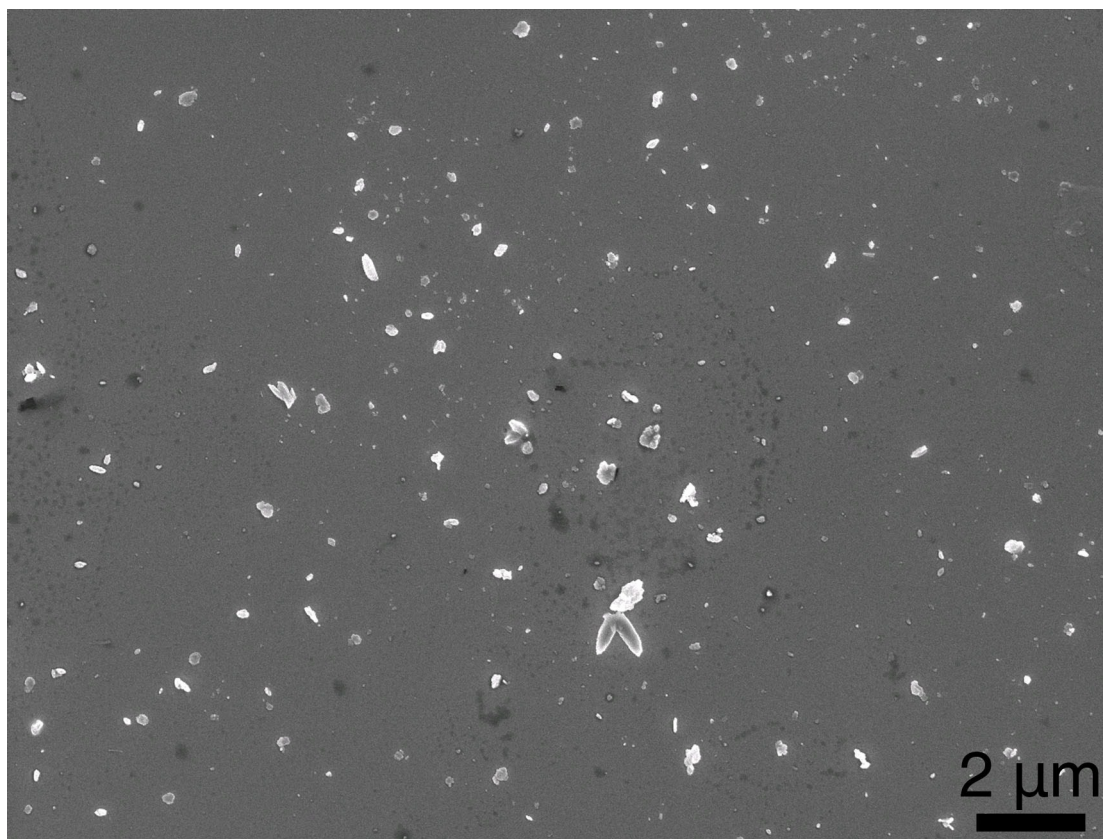

61

62 **Figure S1** SEM image of tricalcium silicate particles dispersed in water at a  
63 concentration of 0.1 wt%.

64

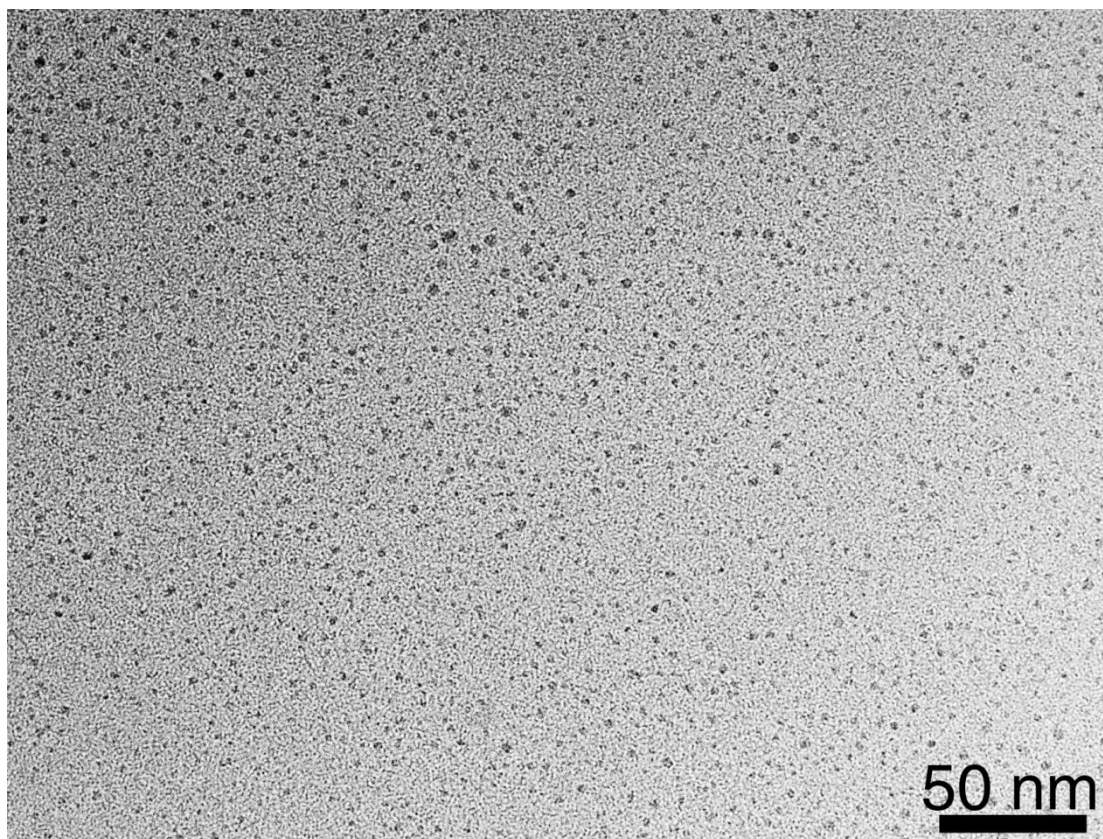

65

66 **Figure S2** TEM image of ce-CNS released from a Portland cement particle at 0°C

67 (Zoomed TEM image of Figure 2D).
